# Supplementary material
Source: PubMed Central journal article supplement (PMC5885834)
Supplement: jamaoncol-4-309-s001.pdf [file jamaoncol-4-309-s001.pdf]

## Supplementary Online Content

Konishi T, Shimada Y, Hsu M, et al. Association of preoperative and postoperative serum carcinoembryonic antigen and colon cancer outcome. *JAMA Oncol*. Published online December 21, 2017. doi:10.1001/jamaoncol.2017.4420

**eTable 1.** Patient and Tumor Characteristics

**eTable 2.** Univariate and Multivariate Analyses of Recurrence Free Survival

**eTable 3.** Analysis of Sites of Metastatic Recurrence in Relation to CEA Status

**eFigure 1.** Kaplan-Meier Curves for RFS in Patients With Normal Preoperative, Normalized Postoperative, or Elevated Postoperative CEA Using a Cutoff of 10 ng/mL

**eFigure 2.** Kaplan-Meier Curves for RFS in Patients With Normal Preoperative, Normalized Postoperative, or Elevated Postoperative CEA, Grouped by TNM Disease Stage

This supplementary material has been provided by the authors to give readers additional information about their work.

eTable 1. Patient and tumor characteristics.

| Characteristic                               | All<br>(N=914)   | Normal<br>Preoperative<br>CEA<br>(N=715) | Normalized<br>Postoperative<br>CEA<br>(N=142) | Elevated<br>Postoperative<br>CEA<br>(N=57) |
|----------------------------------------------|------------------|------------------------------------------|-----------------------------------------------|--------------------------------------------|
| Gender, no. (%) of patients                  |                  |                                          |                                               |                                            |
| Male                                         | 461 (50.4)       | 366 (51.2)                               | 68 (47.9)                                     | 27 (47.4)                                  |
| Female                                       | 453 (49.6)       | 349 (48.8)                               | 74 (52.1)                                     | 30 (52.6)                                  |
| Age, years                                   |                  |                                          |                                               |                                            |
| Median (IQR)                                 | 64 (53-75)       | 64.0 (52.5, 74.0)                        | 63.0 (54.0, 74.0)                             | 74.0 (60.0, 81.0)                          |
| Mean (SD)                                    | 63.4 (13.6)      | 62.9 (13.6)                              | 63.5 (13.4)                                   | 70.6 (12.3)                                |
| BMI                                          |                  |                                          |                                               |                                            |
| Median (IQR)                                 | 28.2 (24.7-32.3) | 28.4 (24.9, 32.3)                        | 28.3 (24.6, 32.1)                             | 25.2 (23.3, 32.0)                          |
| Mean (SD)                                    | 28.9 (6.0)       | 29.0 (6.0)                               | 29.0 (6.2)                                    | 27.1 (6.0)                                 |
| Primary site, no. (%) of patients            |                  |                                          |                                               |                                            |
| Cecum                                        | 158 (17.3)       | 116 (16.2)                               | 21 (14.8)                                     | 21 (36.8)                                  |
| Ascending                                    | 203 (22.2)       | 164 (22.9)                               | 26 (18.3)                                     | 13 (22.8)                                  |
| Transverse                                   | 107 (11.7)       | 85 (11.9)                                | 16 (11.3)                                     | 6 (10.5)                                   |
| Descending                                   | 70 (7.7)         | 56 (7.8)                                 | 8 (5.6)                                       | 6 (10.5)                                   |
| Sigmoid                                      | 246 (26.9)       | 188 (26.3)                               | 52 (36.6)                                     | 5 (8.8)                                    |
| Rectosigmoid                                 | 130 (14.2)       | 106 (14.8)                               | 19 (13.4)                                     | 6 (10.5)                                   |
| Tumor differentiation, no. (%) of patients   |                  |                                          |                                               |                                            |
| Well                                         | 22 (2.4)         | 17 (2.4)                                 | 3 (2.1)                                       | 2 (3.5)                                    |
| Moderate                                     | 732 (80.1)       | 577 (80.7)                               | 115 (81.0)                                    | 40 (70.2)                                  |
| Poor                                         | 157 (17.2)       | 118 (16.5)                               | 24 (16.9)                                     | 15 (26.3)                                  |
| Not available                                | 3 (0.3)          | 3 (0.4)                                  | 0 (0.0)                                       | 0 (0.0)                                    |
| Lymphovascular invasion, no. (%) of patients |                  |                                          |                                               |                                            |
| Yes                                          | 408 (44.6)       | 297 (41.5)                               | 76 (53.5)                                     | 35 (61.4)                                  |
| No                                           | 493 (53.9)       | 406 (56.8)                               | 66 (46.5)                                     | 21 (36.8)                                  |
| Unknown                                      | 13 (1.4)         | 12 (1.7)                                 | 0 (0.0)                                       | 1 (1.8)                                    |
| Lymph node yield, no.                        |                  |                                          |                                               |                                            |

|                                                     |               |                   |                   |                   |
|-----------------------------------------------------|---------------|-------------------|-------------------|-------------------|
| Median (IQR)                                        | 22 (17-30)    | 22.0 (16.0, 29.5) | 22.5 (18.0, 29.5) | 23.0 (17.0, 31.0) |
| Mean (SD)                                           | 24.7 (11.3)   | 24.7 (11.8)       | 24.9 (9.5)        | 23.6 (9.0)        |
|                                                     |               |                   |                   |                   |
| T stage, no. (%) of patients                        |               |                   |                   |                   |
| T1                                                  | 144 (15.8)    | 136 (19.0)        | 2 ( 1.4)          | 6 (10.5)          |
| T2                                                  | 159 (17.4)    | 142 (19.9)        | 11 ( 7.7)         | 6 (10.5)          |
| T3                                                  | 522 (57.1)    | 386 (54.0)        | 105 (73.9)        | 31 (54.4)         |
| T4                                                  | 89 (9.7)      | 51 ( 7.1)         | 24 (16.9)         | 14 (24.6)         |
|                                                     |               |                   |                   |                   |
| N stage, no. (%) of patients                        |               |                   |                   |                   |
| N0                                                  | 593 (64.9)    | 480 (67.1)        | 82 (57.7)         | 31 (54.4)         |
| N1                                                  | 225 (24.6)    | 176 (24.6)        | 35 (24.6)         | 14 (24.6)         |
| N2                                                  | 96 (10.5)     | 59 ( 8.3)         | 25 (17.6)         | 12 (21.1)         |
|                                                     |               |                   |                   |                   |
| AJCC 7 <sup>th</sup> ed. stage, no. (%) of patients |               |                   |                   |                   |
| I                                                   | 245 (26.8)    | 226 (31.6)        | 9 ( 6.3)          | 10 (17.5)         |
| IIA                                                 | 318 (34.8)    | 241 (33.7)        | 61 (43.0)         | 16 (28.1)         |
| IIB                                                 | 22 (2.4)      | 12 ( 1.7)         | 7 ( 4.9)          | 3 ( 5.3)          |
| IIC                                                 | 8 (0.9)       | 1 ( 0.1)          | 5 ( 3.5)          | 2 ( 3.5)          |
| IIIA                                                | 49 (5.4)      | 47 ( 6.6)         | 0 ( 0.0)          | 2 ( 3.5)          |
| IIIB                                                | 222 (24.3)    | 156 (21.8)        | 49 (34.5)         | 17 (29.8)         |
| IIIC                                                | 50 (5.5)      | 32 ( 4.5)         | 11 ( 7.7)         | 7 (12.3)          |
|                                                     |               |                   |                   |                   |
| Preoperative CEA, ng/mL                             |               |                   |                   |                   |
| Median (IQR)                                        | 2.8 (1.9-4.6) | 2.4 (1.7, 3.2)    | 9.4 (6.4, 17.1)   | 11.5 (8.1, 24.5)  |
| Mean (SD)                                           | 5.8 (13.1)    | 2.5 (1.1)         | 15.4 (20.8)       | 22.3 (32.2)       |
|                                                     |               |                   |                   |                   |
| Postoperative CEA, ng/mL                            |               |                   |                   |                   |
| Median (IQR)                                        | 2.5 (1.7-3.7) | 2.0 (1.5, 2.7)    | 2.8 (2.2, 4.1)    | 7.6 (6.4, 10.1)   |
| Mean (SD)                                           | 3.5 (4.5)     | 2.2 (1.0)         | 3.0 (1.1)         | 11.4 (9.6)        |
|                                                     |               |                   |                   |                   |
| Days from surgery to CEA testing                    |               |                   |                   |                   |
| Median (IQR)                                        | 35 (26-49)    | 37.5 (26.0, 51.8) | 31.5 (24.2, 47.8) | 40.0 (27.0, 49.0) |
| Mean (SD)                                           | 39.2 (17.7)   | 40.1 (17.6)       | 36.5 (17.5)       | 41.4 (18.0)       |
|                                                     |               |                   |                   |                   |
| Adjuvant chemotherapy, no. (%) of patients          |               |                   |                   |                   |
| Yes                                                 | 375 (41.0)    | 264 (36.9)        | 87 (61.3)         | 24 (42.1)         |

|         |            |            |           |           |
|---------|------------|------------|-----------|-----------|
| No      | 529 (57.9) | 443 (62.0) | 54 (38.0) | 32 (56.1) |
| Unknown | 10 (1.1)   | 8 ( 1.1)   | 1 ( 0.7)  | 1 ( 1.8)  |

eTable 2. Univariate and multivariate analyses of recurrence free survival

| Variable                 | Univariate   |           |        | Multivariate     |          |        |
|--------------------------|--------------|-----------|--------|------------------|----------|--------|
|                          | % 3-year RFS | 95% CI    | P      | Hazard ratio     | 95% CI   | P      |
| Gender                   |              |           | 0.699  |                  |          |        |
| Male                     | 88.8         | 85.2-91.6 |        |                  |          |        |
| Female                   | 88.0         | 84.2-91.0 |        |                  |          |        |
| Age                      |              |           | 0.006  |                  |          |        |
| <65                      | 90.4         | 87.1-92.9 |        | Ref <sup>a</sup> |          |        |
| ≥65                      | 86.2         | 82.2-89.5 |        | 1.9              | 1.3-2.8  | 0.001  |
| BMI                      |              |           | 0.318  |                  |          |        |
| <30                      | 89.4         | 86.2-91.9 |        |                  |          |        |
| ≥30                      | 86.6         | 82.1-90.2 |        |                  |          |        |
| Primary site             |              |           | 0.733  |                  |          |        |
| Right colon              | 88.2         | 84.6-91.1 |        |                  |          |        |
| Left colon               | 88.6         | 84.9-91.5 |        |                  |          |        |
| Differentiation          |              |           | 0.095  |                  |          |        |
| Well                     | 100          |           |        |                  |          |        |
| Moderate                 | 88.8         | 86.0-91.1 |        |                  |          |        |
| Poor                     | 85.1         | 78.1-90.1 |        |                  |          |        |
| Lymphovascular invasion  |              |           | <0.001 |                  |          |        |
| No                       | 93.3         | 90.4-95.4 |        | Ref              |          |        |
| Yes                      | 82.2         | 77.7-85.9 |        | 1.8              | 1.2-2.8  | 0.008  |
| TNM stage                |              |           | <0.001 |                  |          |        |
| I                        | 98.3         | 95.5-99.4 |        | Ref              |          |        |
| II                       | 90.9         | 87.0-93.8 |        | 2.7              | 1.3-6.2  | 0.007  |
| III                      | 78.3         | 72.8-82.9 |        | 5.7              | 2.8-13.3 | <0.001 |
| CEA group                |              |           | 0.004  |                  |          |        |
| Normal preoperative      | 89.8         | 87.0-92.0 |        | Ref              |          |        |
| Normalized postoperative | 87.9         | 80.8-92.6 |        | 0.77             | 0.45-1.3 | 0.312  |
| Elevated postoperative   | 74.5         | 61.4-84.3 |        | 2.0              | 1.1-3.5  | 0.027  |
| Lymph node yield         |              |           | 0.568  |                  |          |        |
| ≥12                      | 88.3         | 85.8-90.5 |        |                  |          |        |
| <12                      | 92.1         | 73.5-98.0 |        |                  |          |        |

P values were calculated using the log-rank test for univariate analysis and the Cox proportional hazards model for multivariate analysis.

<sup>a</sup>Ref, reference.

eTable 3. Analysis of sites of metastatic recurrence in relation to CEA status

| Recurrence               | Normal preoperative CEA |                        | Normalized postoperative CEA |                        | Elevated postoperative CEA |                       | P     |
|--------------------------|-------------------------|------------------------|------------------------------|------------------------|----------------------------|-----------------------|-------|
|                          | No. (%)                 | % of CEA group (n=715) | No. (%)                      | % of CEA group (n=142) | No. (%)                    | % of CEA group (n=57) |       |
| All sites                | 64                      | 9.0                    | 17                           | 12.0                   | 13                         | 22.8                  |       |
| Liver                    |                         |                        |                              |                        |                            |                       | 0.925 |
| Present                  | 31 (48.4)               | 4.3                    | 8 (47.1)                     | 5.6                    | 7 (53.8)                   | 12.3                  |       |
| Absent                   | 33 (51.6)               | 4.6                    | 9 (52.9)                     | 6.3                    | 6 (46.2)                   | 10.5                  |       |
| Other sites <sup>a</sup> |                         |                        |                              |                        |                            |                       | 0.499 |
| Present                  | 44 (68.8)               | 6.2                    | 10 (58.8)                    | 7.0                    | 7 (53.8)                   | 12.3                  |       |
| Absent                   | 20 (31.3)               | 2.8                    | 7 (41.2)                     | 4.9                    | 6 (46.2)                   | 10.5                  |       |
| M classification         |                         |                        |                              |                        |                            |                       | 0.762 |
| M1a                      | 39 (60.9)               | 5.5                    | 12 (70.6)                    | 8.5                    | 8 (61.5)                   | 14.0                  |       |
| M1b                      | 25 (39.1)               | 3.5                    | 5 (29.4)                     | 3.5                    | 5 (38.5)                   | 8.8                   |       |

P values were calculated using the  $\chi^2$  test.

<sup>a</sup>Lung, n=23; peritoneum, n=21; lymph node, n=18; local, n=6; ovary, n=5; other sites, n=4.

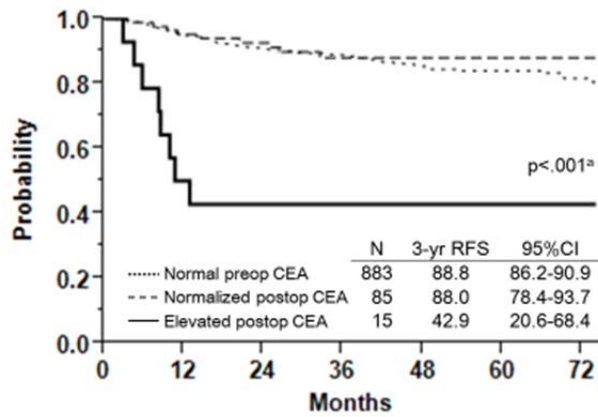

| No. at risk           |     |     |     |     |     |     |    |
|-----------------------|-----|-----|-----|-----|-----|-----|----|
| Normal preop CEA      | 883 | 748 | 545 | 423 | 261 | 164 | 81 |
| Normalized postop CEA | 85  | 78  | 66  | 48  | 36  | 19  | 11 |
| Elevated postop CEA   | 15  | 7   | 4   | 4   | 3   | 2   | 1  |

**eFigure 1.** Kaplan-Meier curves for RFS in patients with normal preoperative, normalized postoperative, or elevated postoperative CEA using a cutoff of 10 ng/mL. <sup>a</sup>normal preoperative CEA vs. elevated postoperative CEA,  $p < .001$ ; normalized postoperative CEA vs. elevated postoperative CEA,  $p < .001$ . preop CEA, preoperative CEA; postop CEA, postoperative CEA.

A, Stage I

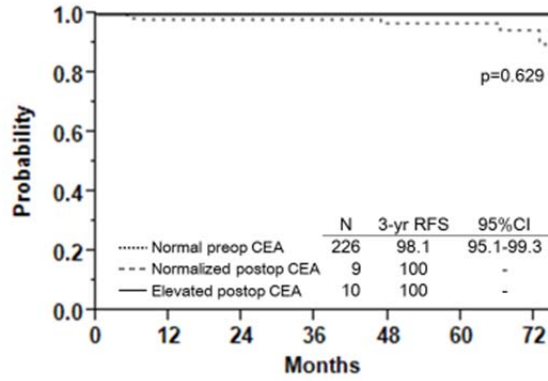

| No. at risk           | 0   | 12  | 24  | 36  | 48 | 60 | 72 |
|-----------------------|-----|-----|-----|-----|----|----|----|
| Normal preop CEA      | 226 | 196 | 149 | 116 | 76 | 59 | 25 |
| Normalized postop CEA | 9   | 9   | 6   | 6   | 3  | 2  | 2  |
| Elevated postop CEA   | 10  | 10  | 7   | 5   | 4  | 3  | 3  |

B, Stage II

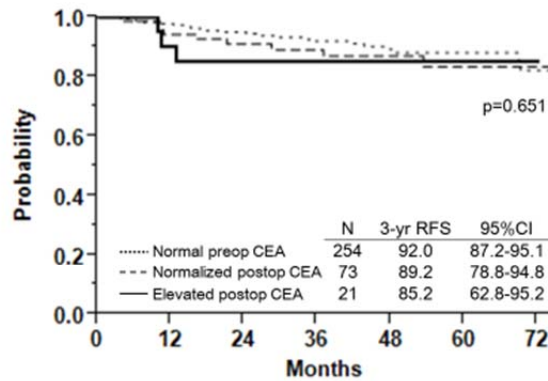

| No. at risk           | 0   | 12  | 24  | 36  | 48 | 60 | 72 |
|-----------------------|-----|-----|-----|-----|----|----|----|
| Normal preop CEA      | 254 | 223 | 171 | 136 | 86 | 47 | 24 |
| Normalized postop CEA | 73  | 64  | 55  | 42  | 31 | 17 | 10 |
| Elevated postop CEA   | 21  | 18  | 15  | 13  | 5  | 3  | 1  |

C, Stage III

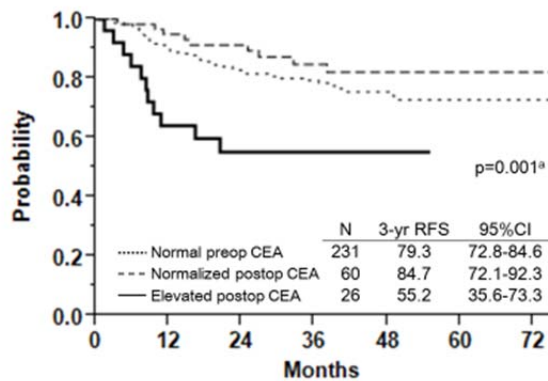

| No. at risk           | 0   | 12  | 24  | 36 | 48 | 60 | 72 |
|-----------------------|-----|-----|-----|----|----|----|----|
| Normal preop CEA      | 231 | 187 | 128 | 99 | 57 | 34 | 20 |
| Normalized postop CEA | 60  | 55  | 46  | 32 | 24 | 14 | 5  |
| Elevated postop CEA   | 26  | 16  | 9   | 6  | 3  | 0  | 0  |

**eFigure 2.** Kaplan-Meier curves for RFS in patients with normal preoperative, normalized postoperative, or elevated postoperative CEA, grouped by TNM disease stage. <sup>a</sup>Normal preoperative CEA vs. elevated postoperative CEA,  $p=0.002$ ; normalized postoperative CEA vs. elevated postoperative CEA,  $p=0.001$ . preop CEA, preoperative CEA; postop CEA, postoperative CEA.
